# Supplementary material for: Identification of molecular signatures specific for distinct cranial sensory ganglia in the developing chick
Source: PubMed Central journal article supplement (PMC4730756; doi:10.1186/s13064-016-0057-y), 2016-01-27

**A**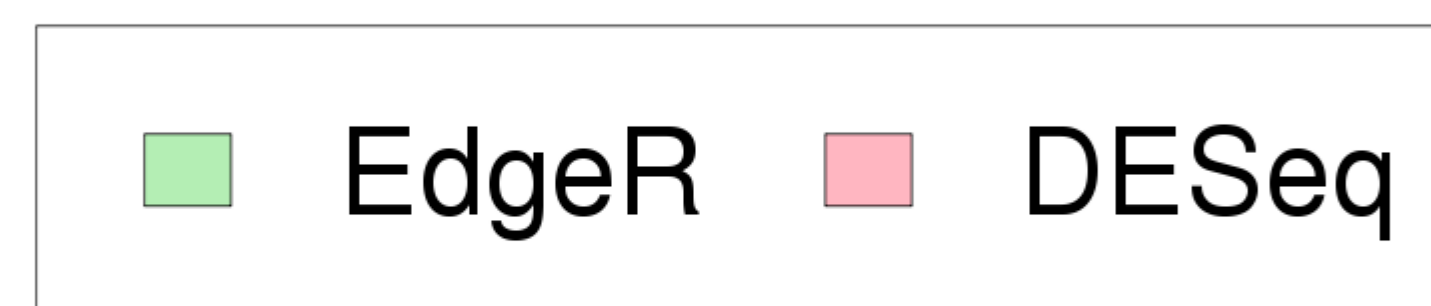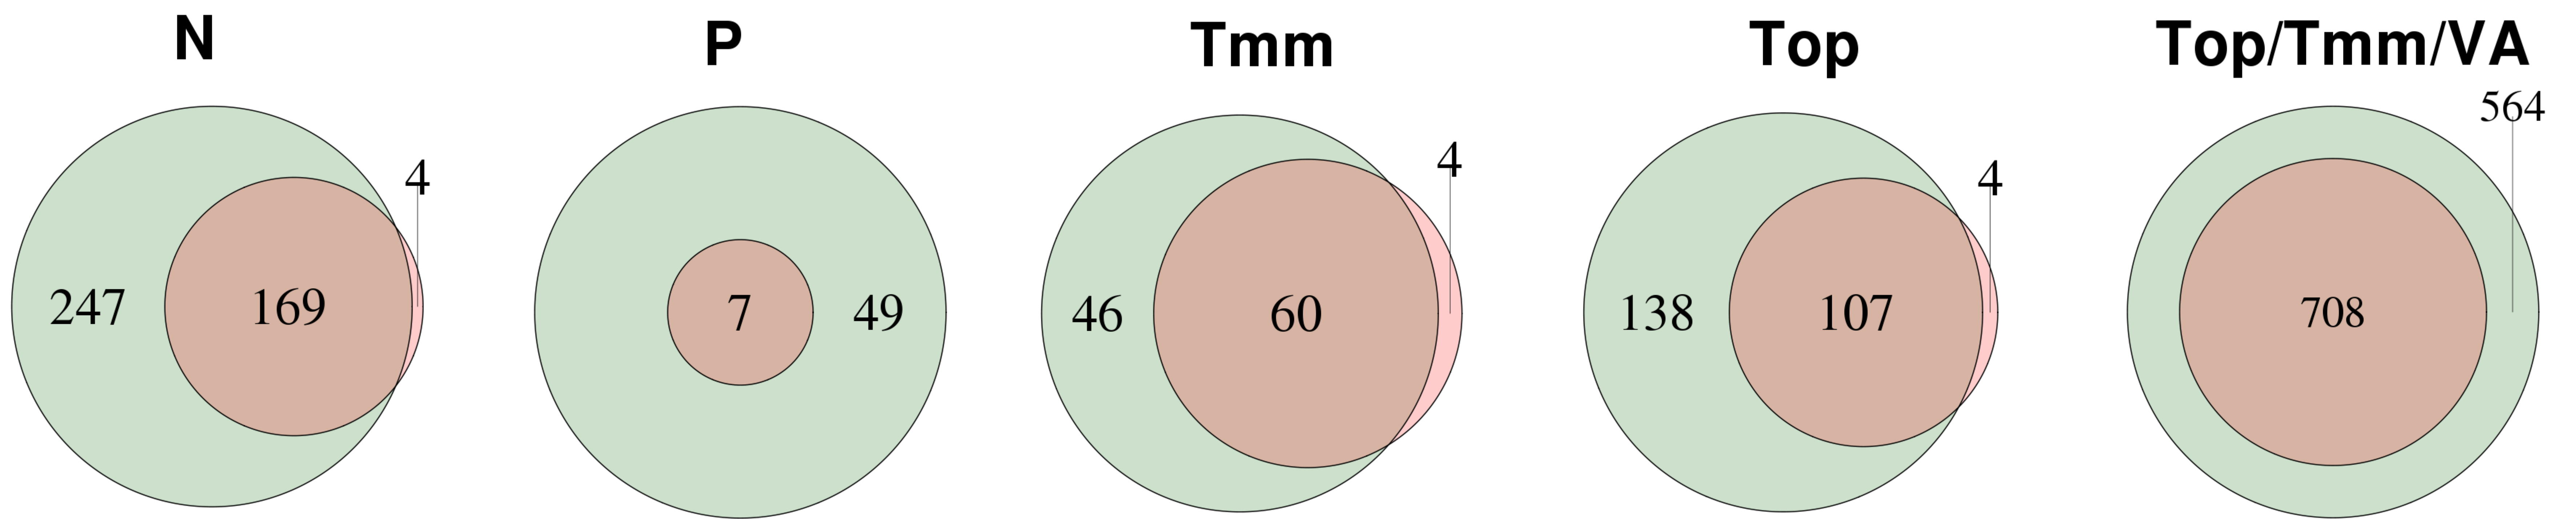**B**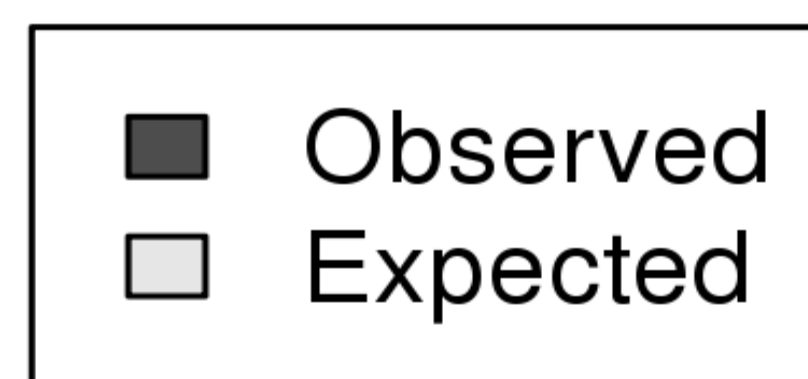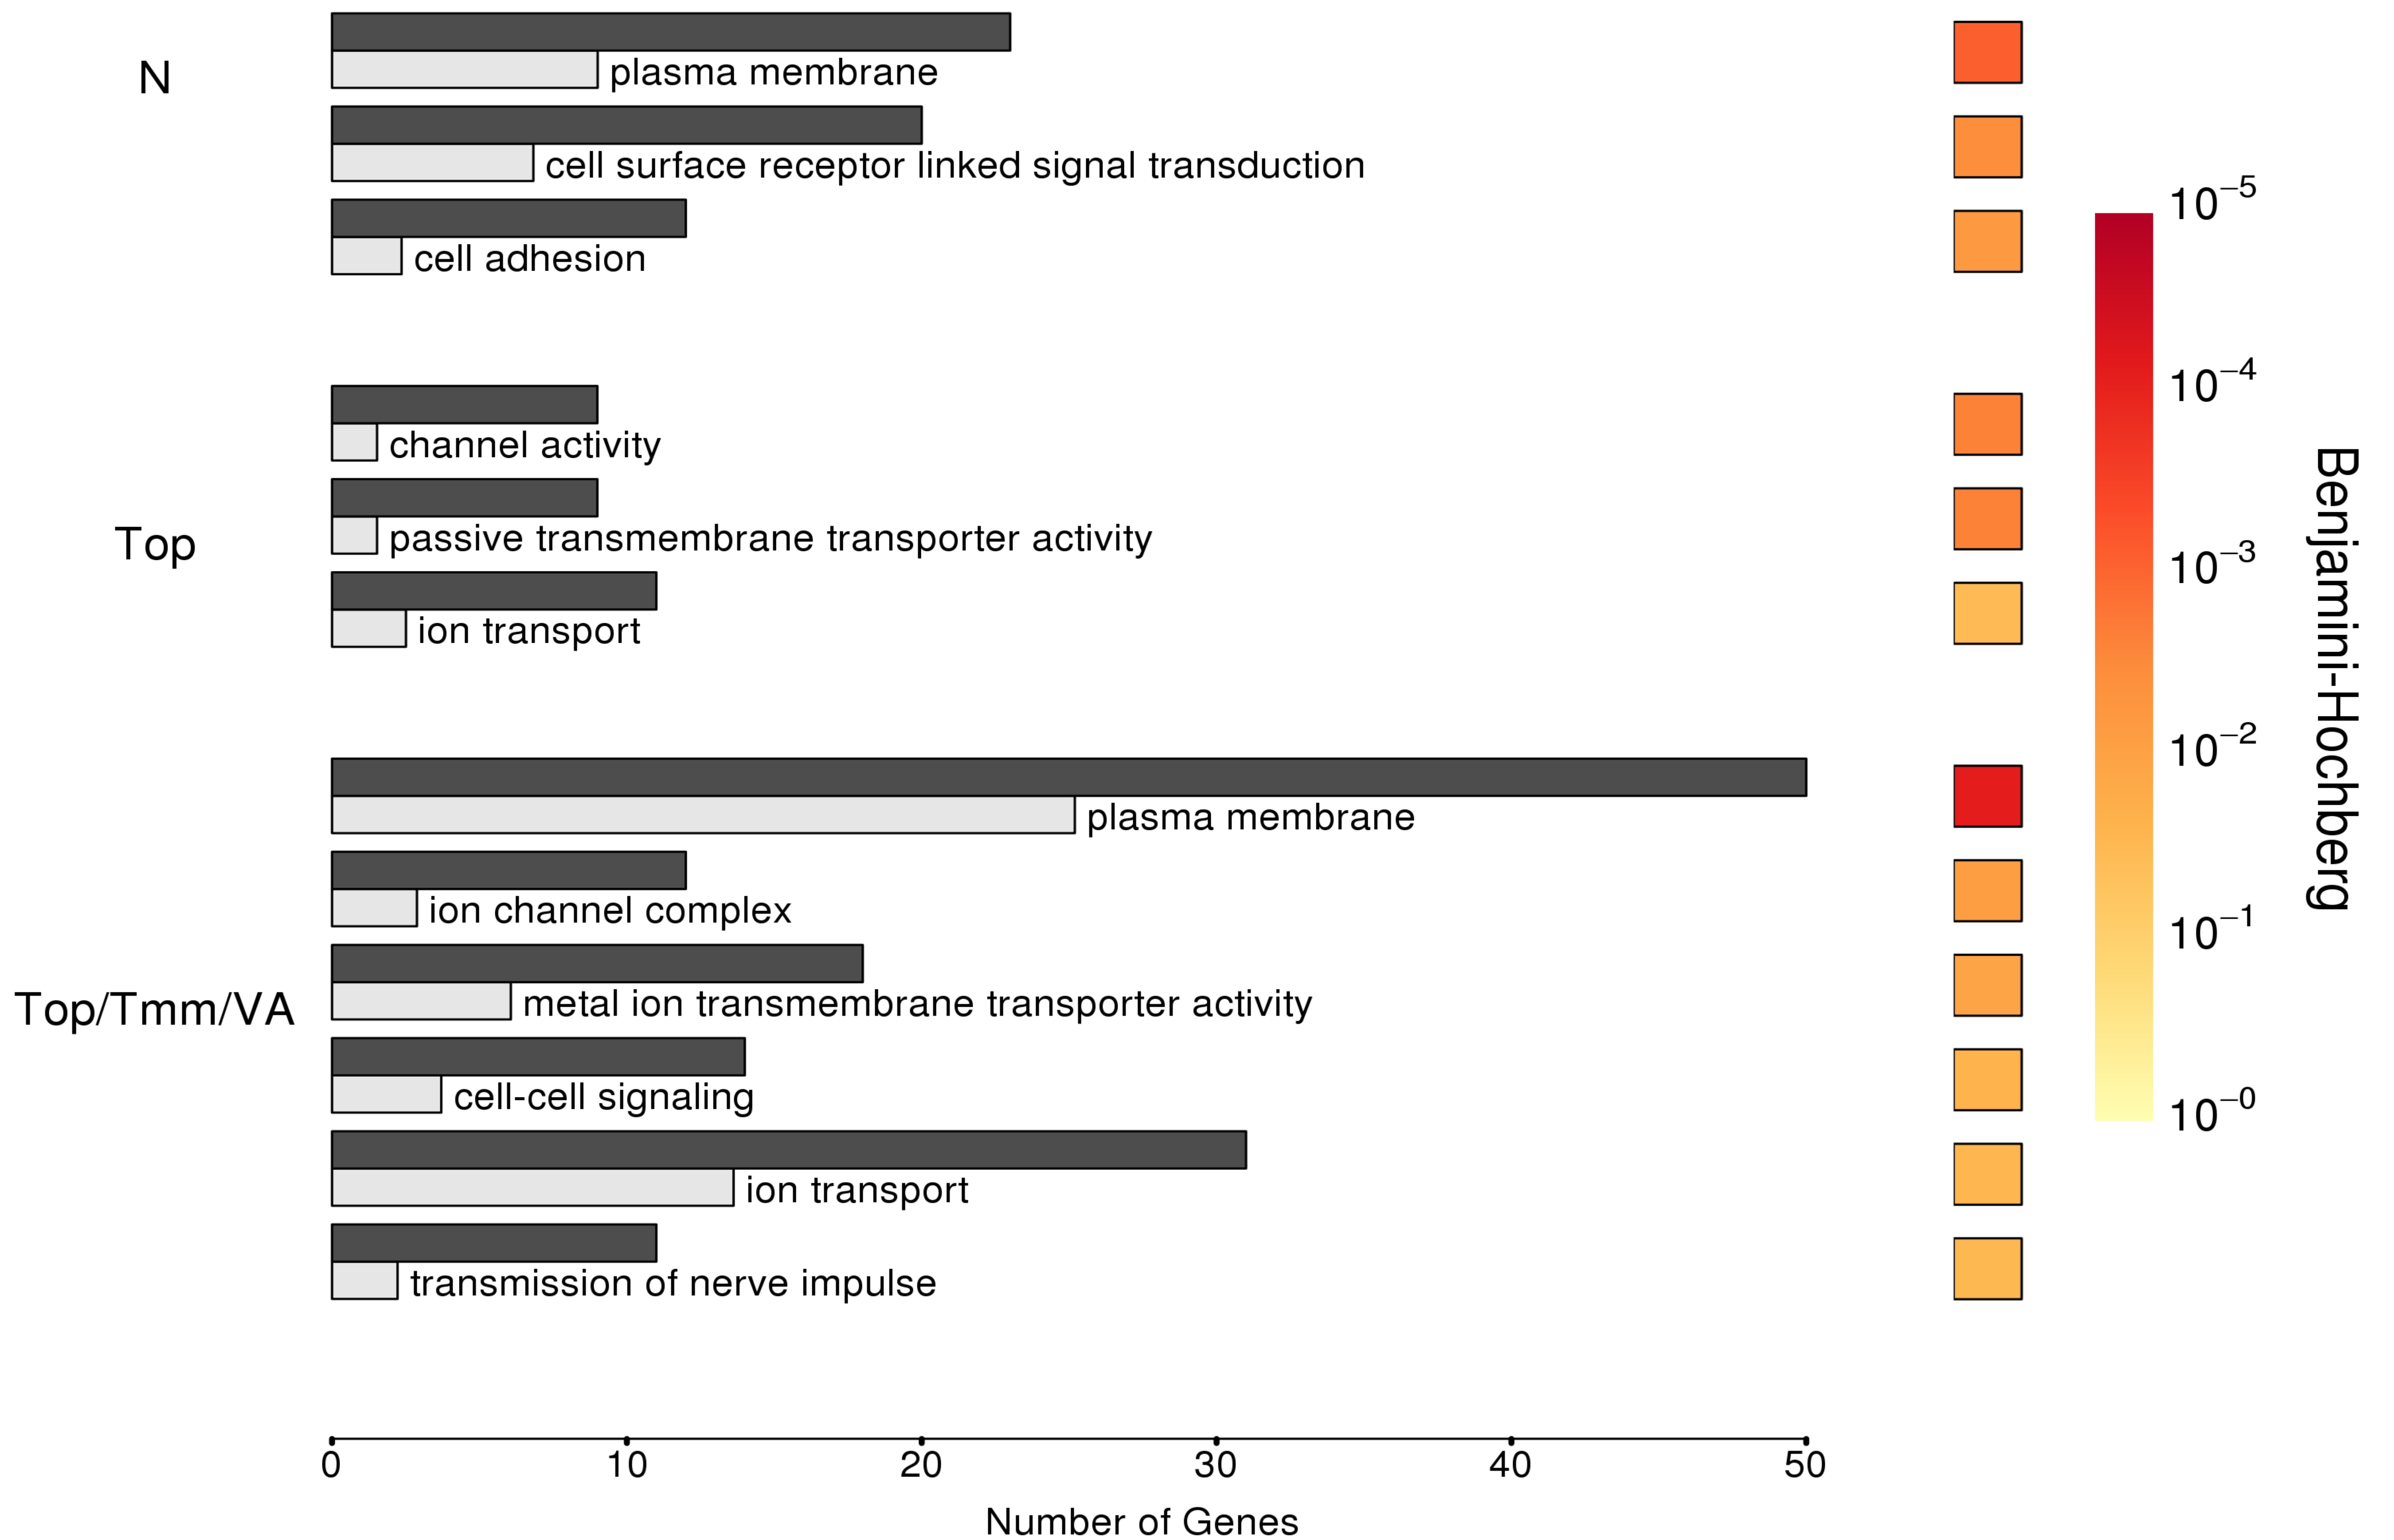

Supplement: 13064_2016_57_MOESM7_ESM.pdf [file 13064_2016_57_MOESM7_ESM.pdf]
